# Supplementary material
Source: bioRxiv or medRxiv preprint supplement (https://medrxiv.org/highwire/filestream/74385/field_highwire_adjunct_files/0/2020.03.23.20041848-1.pdf)
Supplement: Supplementary file [file 2020.03.23.20041848-1.pdf]

**Appendix Table A1:** Results from unweighted logistic regression

| Characteristic                             | OR (95% CI)       | p value          | OR (95% CI)       | p value          |
|--------------------------------------------|-------------------|------------------|-------------------|------------------|
| Age                                        | 1.06 (1.04-1.08)  | <b>&lt;0.001</b> | 1.05 (1.03-1.07)  | <b>&lt;0.001</b> |
| Male                                       | 1.77 (1.05-3.01)  | <b>&lt;0.001</b> | 1.67 (0.98-2.87)  | 0.06             |
| Hubei                                      | 4.72 (2.57-8.95)  | <b>0.03</b>      | 4.69 (2.55-8.88)  | <b>&lt;0.001</b> |
| Before 01/11/2020                          | 1.22 (0.70-2.11)  | <b>&lt;0.001</b> | 1.32 (0.75-2.31)  | 0.332            |
| History of surgery                         | 1.80 (0.37-13.31) | 0.50             | 1.94 (0.38-14.52) | 0.453            |
| Hypertension                               | -                 | -                | 1.47 (0.83-2.60)  | 0.188            |
| CHD                                        | -                 | -                | 2.45 (1.10-5.69)  | <b>0.032</b>     |
| Chronic bronchitis                         | -                 | -                | 1.29 (0.35-5.25)  | 0.712            |
| Lung disease                               | -                 | -                | 1.54 (0.59-4.31)  | 0.392            |
| Diabetes                                   | -                 | -                | 0.72 (0.38-1.35)  | 0.312            |
| Total number of pre-existing comorbidities | 1.27 (0.94-1.71)  | 0.12             | -                 | -                |

OR=odds ratio;

CHD=coronary heart disease;

Bold: statistically significant using threshold 0.05

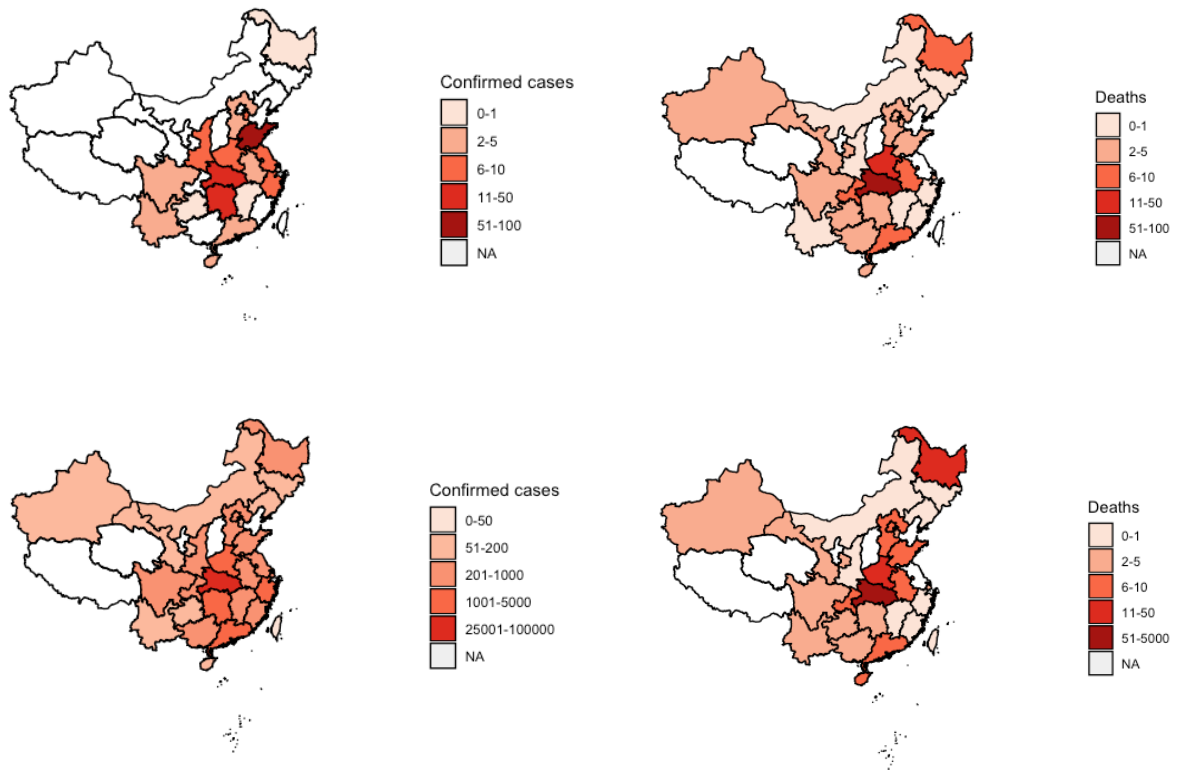

**Appendix Figure A1:** Geographic sample distribution map in China: sample patient distribution across China (top left); sample death patients distribution across China (top right); national confirmed patient distribution across China (bottom left); national death patient distribution across China by March 8<sup>th</sup>, 2020 (bottom right). Darker color represents larger number.
